# Supplementary material
Source: Elsevier journal article supplement (https://www.sciencedirect.com/science/article/pii/S021169952030179X)
Supplement: mmc1 [file S021169952030179X:mmc1.docx]

**Material suplementario**

**Figura 1S-A**. Curvas de Kaplan-Meier de supervivencia. Estimación de supervivencia libre de eventos fatales según el punto de corte EAT de 11,45 mm y un score de CaC > 400 UH**. Figura 1S-B.** Estimación de la supervivencia media libre de eventos CV no fatales y de mortalidad CV según el punto de corte EAT de 11,45 mm y un score de CaC > 400 UH. EAT: tejido de grasa epicárdica; CV: cardiovascular; CaC: calcificación arterial coronaria; UH: unidades Hounsfield.

**Figura 1S.**

1.0

p<0,001

Tiempo (meses).

0

20

40

60

80

100

120

no

si

0.0

0.2

0.4

0.6

0.8

A

80

1.0

0.8

0.6

0.4

0.2

0.0

0

20

40

60

100

120

no

si

p<0,001

B

Tiempo (meses)

Mortalidad, evento cardiovascular y grasa paracardiaca/mediastínica (MAT)

El total de pacientes fallecidos que presentaban un grosor paracardiaco/mediastínico superior a 55,6 mm alcanzó el 23,08%.

Según el análisis de Kaplan-Meier los pacientes con un grosor total de MAT > 55,6 mm tuvieron una mayor mortalidad que aquellos con un grosor total inferior (χ2 5,85, p=0.016) **(Figura 2S-A).**

La supervivencia media de los sujetos con MAT < 55,6 mm fue de 87,06 meses (95% CI 75,98 - 98,14) frente a los 72,96 meses en aquellos con un grosor total superior (95% CI 58,66-87,27).

En el caso de los eventos cardiovasculares de mortalidad, su número total fue bajo (n=20), por lo que existía una pérdida de potencia para su cálculo, con 8 eventos en el grupo de mayor grosos de MAT, superior a 55,6 mm. Aunque la supervivencia con un grosor de MAT> 55,6 mm fue menor que aquellos con un grosor inferior, pero no alcanzó la significación estadística (102,19 meses (IC95% 87,91-116,47) en comparación con 108,17 meses (IC95% 99,2-117,14), χ2 1,09, p=0,31).

Sin embargo, en el análisis de supervivencia con un objetivo combinado (mortalidad CV y eventos CV no fatales), los casos con un grosor total MAT < 55,6 mm de tuvieron una supervivencia media de 96,84 meses (IC95% 86,79-106,88) vs 84,6 meses (IC95% 69,25-99,96) aquellos con mayor grosor (χ2 4,36, p=0,04) **Figura 2S-B.**

**Figura 2S. A**. Supervivencia libre de eventos fatales según el punto de corte de 55,6 mm (mortalidad total) para MAT**. B.** Supervivencia media libre de eventos CV no fatales y de mortalidad CV según el punto de corte de 55,6 mm para MAT. MAT: tejido graso mediastínico; CV: cardiovascular.

0

20

40

60

80

100

120

0.0

0.2

0.4

0.6

0.8

1.0

p=0,016

MAT > 55,6 mm

MAT < 55,6 mm

A

Tiempo (meses).

Tiempo (meses).

0

20

40

60

80

100

120

0.0

0.2

0.4

0.6

0.8

1.0

MAT > 55,6 mm

MAT < 55,6 mm

B

p=0,04
